# Supplementary material
Source: PubMed Central journal article supplement (PMC4755332)

Supplementary Figure 1

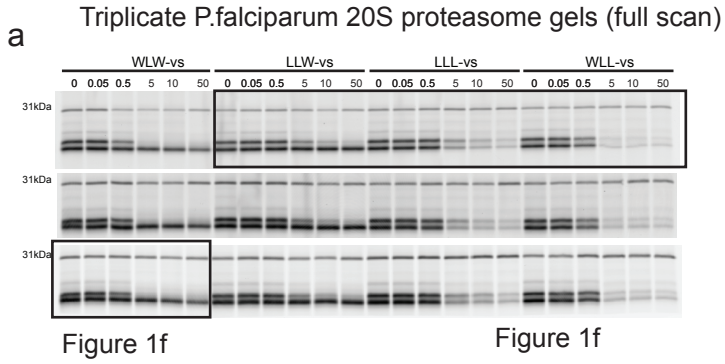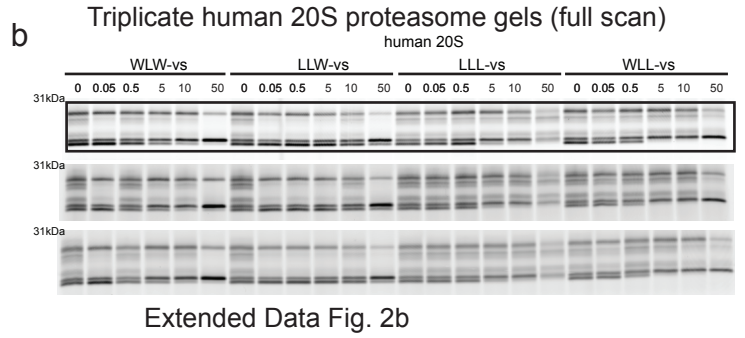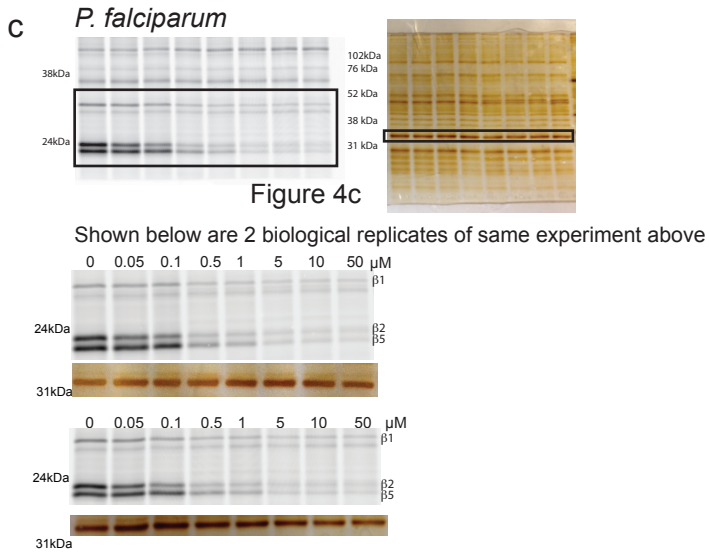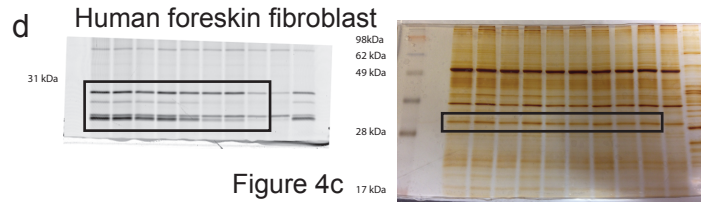

Shown below are 2 biological replicates of same experiment above

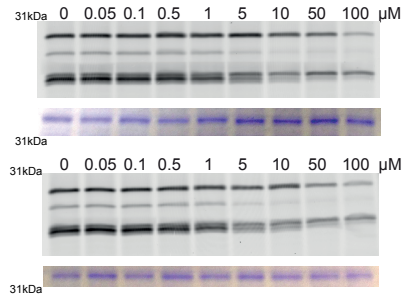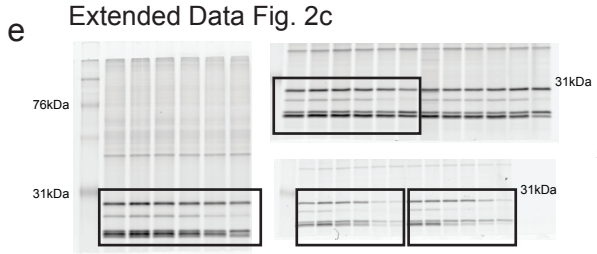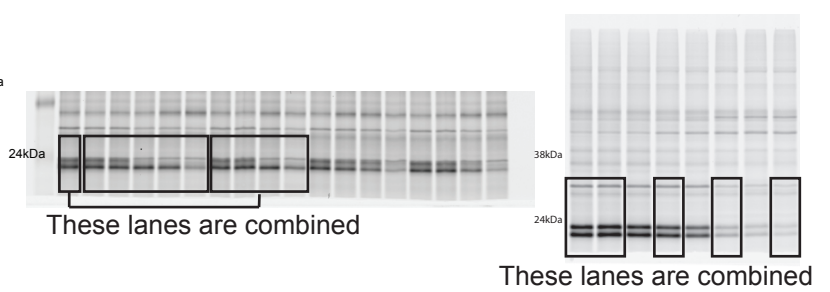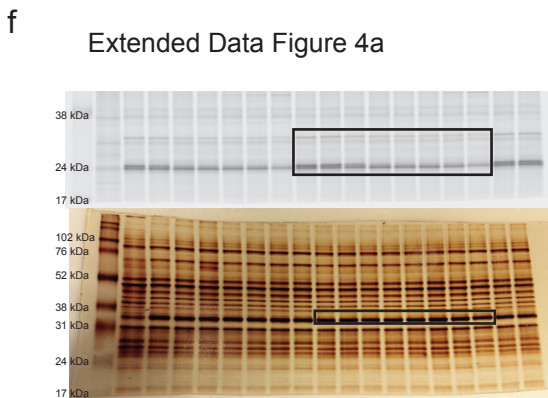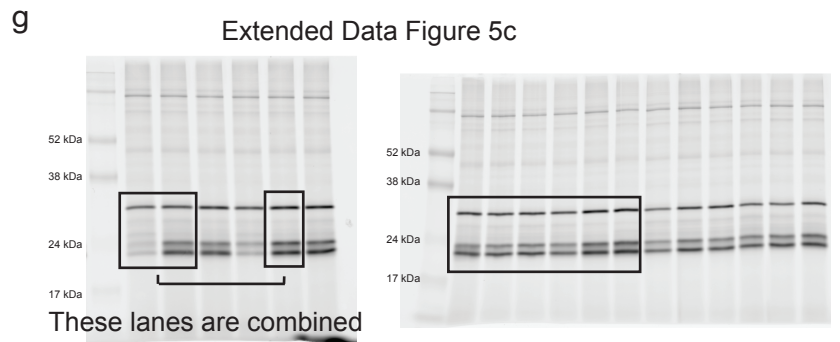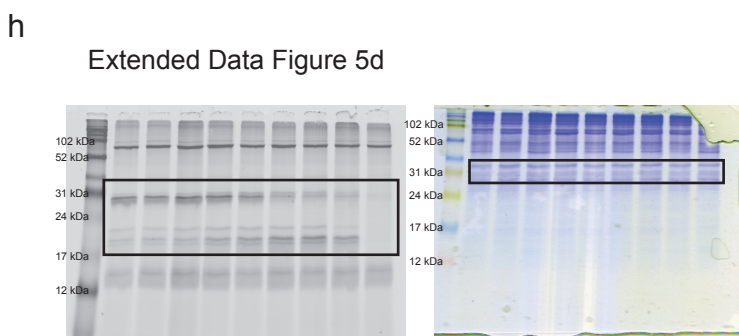

Shown here is a biological replicate of the experiment on the left

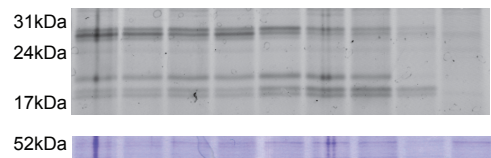

Supplement: NIHMS746504-supplement-1.pdf [file NIHMS746504-supplement-1.pdf]
